# Supplementary material
Source: publisher site journal article supplement (https://www.dovepress.com/article/267000)
Supplement: Supplementary file 1 [file get_supplementary_file.php]

# Supplementary materials

### Supplementary file I

**Search strategy Pubmed, 29-04-2020**

(("Lupus Erythematosus, Systemic"[mesh] OR "systemic lupus erythematosus"[tw] OR "SLE"[tw] OR "NPSLE"[tw] OR "Lupus"[tw]) AND ("Myelitis, Transverse"[Mesh] OR "myelitis transversa"[tw] OR "myelitis transverse"[tw] OR "transverse myelitis"[tw] OR "Demyelinative Myelitis"[tw] OR "Necrotising Myelitis"[tw] OR "Necrotizing Myelitis"[tw] OR "Myelitis"[mesh] OR "myelitis"[tw] OR "myelopathy"[tw] OR myelopath*[tw]) NOT ("Animals"[mesh] NOT "Humans"[mesh]) AND (english[la] OR dutch[la] OR german[la]))

**
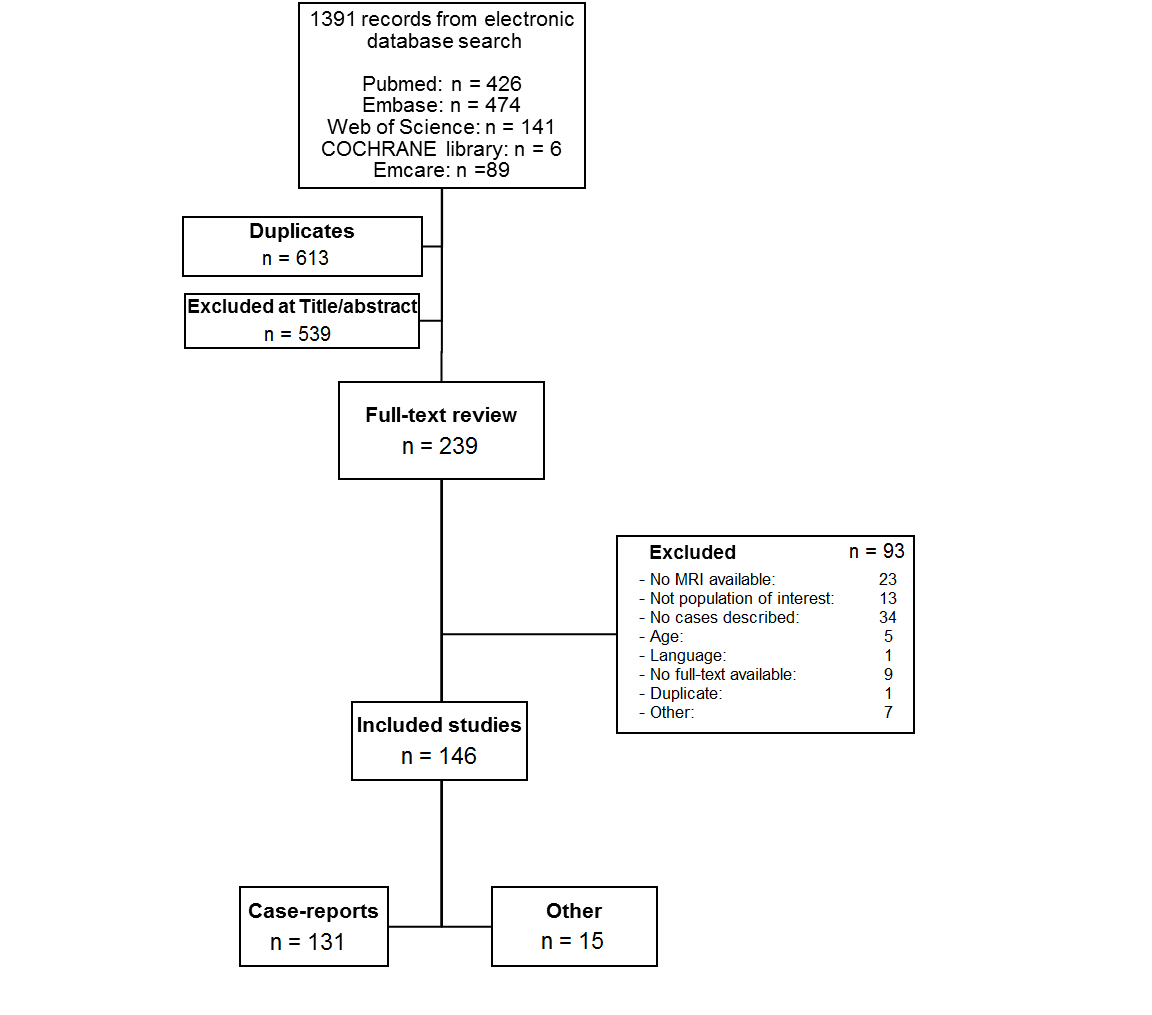
**

**Supplementary figure 1**  Literature review, article selection process

### *Supplementary file II*

**Quality assessment**

Risk of bias was considered high in case-reports and case-series, as selective reporting is present by default and clinical outcome is not predefined. Risk of bias varied among the observational studies: the majority of studies identified patients with TM by retrospective chart review of SLE patients in a given time period in one hospital. Some articles reported the total amount of patients identified and included, showing the most transparency about the process selection. 37, 41, 44, 45, 48, 50, 52 Other studies did not mention how many patients were originally identified 1, 24, 40, 46, 47,51-52 and two studies collected data by inviting clinicians to participate and reporting cases, leading to a higher risk of bias. 23, 49 Clinical outcome was predefined in most studies, using validated scales such as the American Spinal Injury Association scale for spinal cord injury. In other studies, outcome of individual participants was described in great detail and therefore the decision rules defined regarding clinical outcome in the *Method* sections could be applied easily. 25,27,32 Only one study did not have a clear definition what was considered recovery/improvement in patients with TM. 28

### *Supplementary file III*

### Supplementary table 1Data extracted from case-reports and case-series, ordered chronologically

| **Ref** | **Sex** | **Age**  (yrs) | **SLE**a | **Onset**  (yrs)b | **sMRI** | **CSF assessment** | | | | | | **Outcome**c |
| --- | --- | --- | --- | --- | --- | --- | --- | --- | --- | --- | --- | --- |
|  |  |  |  |  |  | **Abn** | ↑ **WBC** | ↑ **Protein** | ↓ **Glucose** | **OCBs** | **IgG index** |  |
| Kenik *et al* 53 | F | 32 | + | 5 | + | + | + | + | + | NA | NA | ST: - |
| Marabani *et al 12* | F | 34 | + | 7 | - | NA | NA | NA | NA | NA | NA | ST: + |
| Boumpas et al *54* | F | 18 | + | 6 | + | + | + | + | + | NA | NA | ST: +/- |
| Moriwaka et al 55 | F | 50 | + | 0 | + | NA | NA | NA | NA | NA | NA | LT: +/++ |
| Berlanga *et al* 56 | F | 48 | + | NA | + | + | + | + | - | NA | NA | LT: +/- |
| Nived *et al* 57 | F | 31 | + | 4 | + | - | - | NA | NA | - | - | LT: ++ |
| Provenzale *et al* 11 | F | 17 | + | 2 | - | + | + | + | + | - | + | LT: +/- |
| Simeon-Aznar  *et al* 58 | F | 38 | + | 9 | + | + | - | + | - | - | NA | HD: -- |
| M | 22 | + | 5 | + | + | - | + | - | - | NA | LT: - |
| Tola *et al* 59 | F | 16 | + | 4 | + | + | + | NA | NA | - | + | LT: - |
| Holtas *et al 60* | F | 32 | NA | NA | + | NA | NA | NA | NA | NA | NA | NA: +/- |
| Klaiman *et al 61* | F | 30 | - | 0 | + | + | - | + | + | NA | NA | LT: +/- |
| Provenzale *et al* 62 | F | 33 | + | NA | + | NA | NA | NA | NA | NA | NA | NA |
| F | 47 | + | NA | + | NA | NA | NA | NA | NA | NA | NA |
| F | 40 | + | NA | + | NA | NA | NA | NA | NA | NA | NA |
| F | 46 | + | NA | + | NA | NA | NA | NA | NA | NA | NA |
| Salmaggi *et al 22* | F | 29 | - | 0 | - | - | - | - | - | - | NA | ST: ++ |
| F | 38 | - | 0 | + | + | + | NA | NA | NA | + | LT: +/- |
| F | 18 | - | 0 | - | NA | NA | NA | NA | NA | NA | LT: +/- |
| F | 18 | + | >0 | - | NA | NA | NA | NA | NA | NA | ST: ++ |
| Stahl *et al* 63 | F | 34 | + | 8 | + | - | - | - | - | NA | - | NA: ++ |
| F | 28 | + | 0 | + | NA | NA | NA | NA | NA | NA | LT: +/- |
| Valensini *et al 13* | F | 24 | + | 6 | - | + | - | + | - | NA | NA | HD: +/- |
| Lopez Dupla *et al 64* | F | 51 | + | 0 | + | + | + | + | NA | NA | NA | LT: -- |
| Oriordan *et al 65* | F | 42 | - | 0 | + | - | - | - | - | NA | NA | LT: +/- |
| Smyth *et al* *14* | F | 58 | + | 12 | - | + | - | + | - | NA | NA | LT: +/- |
| Kuzma *et al* *66* | F | 48 | NA | 0 | + | NA | NA | NA | NA | NA | NA | NA |
| Osawa *et al 15* | F | 31 | + | 10 | - | + | + | - | - | NA | NA | LT: +/++ |
| Radis *et al 67* | M | 29 | + | 0 | + | NA | NA | NA | NA | NA | NA | LT: +/- |
| Habr *et al 68* | F | 41 | + | 8 | + | + | + | + | - | NA | NA | ST: +/++ |
| Inslicht *et al 69* | F | 32 | - | 0 | + | NA | NA | NA | NA | NA | NA | LT: - |
| F | 57 | + | 5 | + | NA | NA | NA | NA | NA | NA | LT: -- |
| F | 29 | - | 0 | + | + | + | + | NA | NA | NA | HD: +/- |
| Schantz *et al 70* | F | 28 | + | 10 | + | + | + | + | + | NA | NA | LT: + |
| Rodriguez  *et al 71* | F | 21 | - | 0 | + | + | + | + | + | NA | NA | HD: + / ++ |
| F | 32 | + | >10 | + | + | + | + | + | NA | NA | HD: + / ++ |
| Bonnet *et al 16* | F | 24 | + | 7 | - | + | NA | - | NA | NA | + | LT: ++ |
| Deodhar *et al 72* | F | 21 | + | 5 | + | + | + | + | + | NA | NA | ST: + |
| Huang *et al 73* | M | 25 | NA | 7 | + | - | - | - | - | NA | NA | HD: +/- |
| Margaux *et al 74* | F | 24 | + | 7 | + | NA | NA | NA | NA | NA | NA | LT: -- |
| Mok *et al 75* | F | 37 | + | 7 | + | - | - | - | - | - | NA | ST: +/- |
| Neumann-A *et al 76* | M | 30 | + | 15 | + | + | + | + | + | - | + | LT: - |
| Trysberg *et al 77* | F | 16 | + | 0 | + | + | + | - | NA | - | NA | LT: +/- |
| Tellez-Zenteno *et al 78* | F | 37 | + | 16 | + | + | + | + | NA | NA | NA | LT: - |
| F | 28 | + | 1 | + | + | + | + | NA | NA | NA | LT: - |
| F | 32 | NA | 16 | + | NA | NA | NA | NA | NA | NA | LT |
| F | 24 | NA | 7 | + | + | + | - | NA | NA | NA | LT +/- |
| F | 38 | NA | 7 | + | - | - | - | NA | NA | NA | LT: - |
| F | 23 | NA | 2 | + | NA | NA | NA | NA | NA | NA | LT: - |
| Yazawa *et al 79* | F | 26 | + | 4 | + | + | + | + | - | NA | NA | LT: - |
| Gibbs *et al 80* | F | 48 | + | 3 | + | NA | NA | NA | NA | NA | NA | ST: - |
| Kimura *et al 81* | F | 25 | + | 8 | + | + | + | + | + | - | + | LT: - |
| Drake *et al 82* | F | 36 | + | 19 | + | + | + | + | + | NA | NA | ST: +/- |
| Leung *et al 83* | F | 52 | + | 3 | + | + | + | + | NA | - | NA | NA |
| Suralkar *et al 84* | F | 30 | - | 0 | + | + | + | + | - | NA | NA | ST: ++ |
| Charakidas *et al 85* | F | 28 | + | 0 | + | + | + | NA | NA | NA | NA | LT: +/- |
| Chen *et al* *21* | F | 53 | + | 0 | - | + | - | + | - | - | NA | LT: +/- |
| Krishnan *et al 86* | F | 21 | NA | 5 | + | NA | NA | NA | NA | - | NA | NA |
| *Lehnhardt et al 87* | F | 19 | NA | 0 | + | NA | NA | NA | NA | NA | NA | NA |
| Mok *et al 88* | F | 22 | + | 5 | + | - | - | - | - | - | NA | ST: +/- |
| Moranne *et al 89* | F | 35 | - | 16 | + | + | + | + | NA | NA | NA | LT: ++ |
| Salmi *et al 17* | F | 16 | + | 0 | - | - | - | - | - | NA | NA | HD: +/- |
| dos Santos *et al 90* | F | 40 | + | 0 | + | + | + | + | - | NA | NA | LT: ++ |
| Ferreira *et al 91* | F | 44 | + | 13 | + | + | + | NA | NA | + | NA | NA: +/- |
| Fioravanti *et al 92* | F | 50 | NA | >0 | + | NA | NA | NA | NA | NA | NA | LT: + |
| Hagiwara *et al 93* | F | 55 | + | 7 | + | NA | NA | NA | NA | NA | NA | LT: ++ |
| Rheu *et al 94* | F | 28 | + | 4 | + | + | + | + | + | NA | NA | LT: - |
| Yago *et al 95* | F | 27 | + | 8 | + | + | + | + | + | NA | NA | ST: - |
| Yamanaka *et al 96* | F | 24 | + | 0 | + | + | + | + | + | - | NA | ST: - |
| Armstrong *et al 97* | F | 70 | - | 6 | + | NA | NA | NA | NA | NA | NA | LT: +/- |
| Lehnhardt *et al 98* | F | 19 | + | 0 | + | + | + | + | - | NA | NA | LT: +/- |
| Mok *et al 18* | F | 51 | + | 8 | + | + | + | + | - | NA | NA | ST: +/- |
| F | 39 | + | 0 | + | + | + | + | + | NA | NA | ST: +/- |
| F | 27 | + | 2 | - | + | + | + | + | + | NA | ST: ++ |
| Birnbaum *et al 99* | F | 31 | + | 7 | + | + | + | - | - | - | - | LT: +/- |
| Heinlein *et al 100* | M | 35 | + | 3 | + | + | + | + | + | NA | NA | LT: - |
| Ilniczky *et al 101* | F | 46 | + | 0 | + | + | - | + | NA | NA | - | ST: +/- |
| Tomietto *et al 102* | F | 33 | + | 11 | + | - | - | - | - | NA | NA | LT: ++ |
| Touma *et al 103* | F | 34 | + | 6 | + | NA | NA | NA | NA | NA | NA | LT: +/- |
| Birnbaum *et al 104* | F | 38 | + | 2 | + | NA | NA | NA | NA | NA | NA | LT: +/- |
| Mehta *et al 105* | F | 47 | + | >0 | + | NA | NA | NA | NA | NA | NA | ST: +/- |
| Mok *et al 106* | F | 40 | + | 0 | + | + | + | + | + | - | NA | LT: +/- |
| Orzechowski *et al 107* | F | 31 | NA | >0 | + | + | + | + | NA | NA | NA | ST: ++ |
| Almoallim *et al 108* | F | 65 | - | 0 | + | + | + | + | - | NA | NA | LT: + |
| Ammouri  *et al 109* | F | 22 | NA | 4 | + | - | - | - | - | NA | NA | LT: ++ |
| F | 22 | NA | 3 | + | + | - | + | - | NA | NA | LT: ++ |
| Celebisoy *et al 110* | F | 27 | + | 0 | + | - | - | - | - | - | NA | ST: - |
| Karim *et al 111* | F | 22 | + | 0 | + | NA | NA | NA | NA | NA | NA | HD: +/- |
| Mottaghi *et al 112* | F | 34 | + | 0 | + | NA | NA | NA | NA | NA | NA | LT: + / ++ |
| Mula *et al 113* | F | 63 | + | 0 | + | + | - | + | - | + | + | LT: ++ |
| Nasir *et al 114* | F | 48 | + | 3 | + | NA | NA | NA | NA | NA | NA | LT: - |
| Gonzalez *et al 115* | F | 18 | NA | 2 | + | + | - | + | - | NA | NA | NA. +/++ |
| Katchanavo *et al 116* | F | 48 | + | 20 | + | + | + | NA | - | NA | NA | LT: ++ |
| Marcel *et al 117* | F | 34 | NA | 0 | + | NA | NA | NA | NA | NA | NA | NA |
| Pellkofer *et al 118* | F | 44 | NA | 30 | + | NA | NA | NA | NA | NA | NA | LT: +/- |
| Richard *et al 119* | F | 65 | + | 16 | + | - | - | NA | NA | NA | - | HD: -- |
| Zotos *et al 120* | F | 28 | NA | >0 | + | NA | NA | NA | NA | NA | NA | HD: ++ |
| Deme *et al 121* | F | 40 | + | 8 | + | + | + | + | - | NA | NA | HD: ++ |
| Kayim *et al 122* | F | 30 | + | 4 | + | + | + | + | + | - | NA | LT: - |
| Polgar *et al 123* | F | 48 | - | 0 | + | NA | NA | NA | NA | NA | NA | LT: +/- |
| Rodrigues  *et al 19* | M | 27 | + | 4 | + | NA | NA | NA | NA | NA | NA | LT: ++ |
| F | 54 | + | >0 | - | + | - | + | NA | - | NA | LT: ++ |
| Ye *et al 124* | F | 31 | + | 1 | + | + | + | + | + | NA | NA | LT: - |
| F | 27 | + | 8 | + | + | + | + | + | NA | NA | LT: +/- |
| F | 20 | + | 3 | + | + | + | + | - | NA | NA | LT: + |
| F | 58 | + | 0 | + | + | + | + | - | NA | NA | LT: ++ |
| M | 16 | + | 1 | + | + | + | + | + | NA | NA | LT: ++ |
| Hernando *et al 125* | F | 34 | + | 16 | + | + | + | + | - | NA | NA | LT: - |
| Katsumata  *et al 126* | F | 28 | + | NA | + | NA | NA | NA | NA | NA | NA | NA: - |
| F | 23 | + | NA | + | NA | NA | NA | NA | NA | NA | NA: +/- / ++ |
| F | 28 | + | NA | + | NA | NA | NA | NA | NA | NA | NA: - |
| White *et al 127* | M | 18 | + | 3 | + | + | + | + | - | - | NA | LT: + |
| Gude *et al 128* | F | 27 | + | 4 | + | + | + | + | - | NA | NA | NA |
| Huang *et al 129* | M | 39 | + | 0 | + | + | + | + | + | - | + | ST: - |
| Jiang *et al 130* | F | 19 | - | 0 | + | + | NA | + | NA | NA | NA | LT: ++ |
| Yachoui *et al 131* | F | 41 | - | 0 | + | + | + | - | - | - | - | LT: ++ |
| Zavada *et al 132* | F | 48 | + | 12 | + | + | NA | NA | NA | NA | + | LT: NA |
| Adawi *et al 133* | F | 19 | + | 5 | + | NA | NA | NA | NA | NA | NA | LT: +/- |
| Kim *et al 134* | F | 41 | + | 15 | + | - | - | - | - | - | NA | LT: - |
| Li *et al 48* | M | 26 | + | 7 | + | NA | NA | NA | NA | NA | NA | NA: + |
| Loster-N *et al 135* | M | 24 | NA | 0 | + | + | + | + | NA | NA | NA | NA: - |
| Modjinou *et al 136* | F | 30 | + | 0,5 | + | NA | NA | NA | NA | NA | NA | LT: ++ |
| Guerrero *et al 137* | F | 34 | + | 14 | + | + | + | + | + | NA | + | HD: -- |
| Hamming *et al*20 | F | 29 | + | 0 | - | + | + | + | + | + | + | NA: +/- |
| Menor *et al 138* | F | 22 | + | 7 | + | + | + | + | - | NA | NA | HD: -- |
| Nardone *et al 139* | F | 44 | NA | 3 | + | + | + | + | - | NA | NA | NA |
| Takei *et al 140* | M | 48 | + | 6 | + | + | + | + | + | NA | + | LT: +/- |
| Kovacs *et al 141* | F | 34 | NA | 11 | + | NA | NA | NA | NA | NA | + | NA |
| Srivastava *et al 142* | F | 30 | - | 0 | + | + | - | + | - | NA | NA | ST: +/- |
| Tono *et al 143* | F | 42 | + | 0 | + | + | + | + | NA | NA | NA | HD: -- |
| Chessa *et al 144* | F | 32 | + | 0 | + | + | NA | + | NA | + | NA | LT: - |
| F | 44 | + | 0 | + | + | NA | + | NA | - | NA | LT: ++ |
| F | 49 | + | 15 | + | + | + | + | NA | - | NA | LT: +/- |
| F | 40 | + | 0 | + | + | NA | NA | NA | - | + | LT: ++ |
| F | 43 | + | 0 | + | NA | NA | NA | NA | NA | NA | LT: +/- |
| Deveza *et al 145* | F | 21 | + | 3 | + | + | + | + | + | - | NA | LT: - |
| Mansoor *et al 146* | F | 30 | - | 0 | + | + | + | + | - | NA | NA | ST: +/- |
| Oiwa *et al 147* | F | 25 | NA | 4 | + | NA | NA | NA | NA | NA | NA | LT: - |
| F | 35 | NA | 0 | + | NA | NA | NA | NA | NA | NA | LT: - |
| Aguirre- V *et al* *148* | F | 23 | + | 4 | + | NA | NA | NA | NA | NA | NA | LT: +/ |
| Asgari *et al 149* | F | 63 | NA | 35 | + | NA | NA | NA | NA | NA | NA | NA: + / ++ |
| Bozic *et al 150* | F | 38 | + | 1 | + | + | - | + | + | - | - | LT: +/- |
| Duarte *et al 151* | F | 39 | + | 13 | + | + | + | + | - | - | NA | LT: +/- |
| Furtado *et al 152* | F | 18 | + | 8 | + | NA | NA | NA | NA | NA | NA | LT: -- |
| Raciborska *et al* *153* | F | 35 | - | 0 | + | + | - | + | - | NA | NA | HD: +/- |
| Patterson *et al 154* | F | 21 | - | 0 | + | + | + | + | + | - | + | LT: +/++ |
| Schattner *et al 155* | F | 38 | - | 0 | + | - | NA | NA | NA | NA | - | LT: ++ |
| Shidahara *et al 156* | F | 24 | + | 0,5 | + | NA | NA | NA | NA | NA | NA | LT: +/++ |
| Zahid *et al 157* | M | 26 | + | 8 | + | + | NA | + | - | NA | NA | ST: +/- |
| Chaneva *et al 158* | F | 32 | + | 0 | + | + | + | + | NA | + | + | LT: - |
| Jackson *et al 159* | F | 23 | + | 9 | + | NA | NA | NA | NA | NA | NA | LT: + |
| Jha *et al 160* | F | 20 | - | 0 | + | + | + | + | - | - | NA | NA: +/++ |
| Lavandier *et al 161* | M | 92 | NA |  | + | NA | NA | NA | NA | - | NA | NA |
| Martin-Nares  *et al 162* | F | 52 | - | 0 | + | NA | NA | NA | NA | NA | NA | ST: +/- |
| F | 41 | NA | 1 | + | NA | NA | NA | NA | NA | + | NA |
| F | 40 | + | 3 | + | NA | NA | NA | NA | NA | NA | NA: +/++ |
| F | 56 | + | 17 | + | NA | NA | NA | NA | NA | NA | NA: +/- |
| F | 34 | + | 5 | + | NA | NA | NA | NA | NA | NA | NA: +/++ |
| F | 30 | + | 0 | + | NA | NA | NA | NA | NA | NA | NA: +/- |
| F | 59 | + | 4 | + | NA | NA | NA | NA | NA | NA | NA: +/- |
| Martins *et al 163* | F | 47 | + | >0 | + | NA | NA | NA | NA | NA | NA | ST: +/- |
| Mehmood *et al 164* | M | 26 | + | 5 | + | NA | NA | NA | NA | NA | NA | HD: + |
| Seyedali *et al 165* | F | 47 | NA | NA | + | + | + | + | - | - | NA | ST: +/ ++ |
| Thabah *et al 166* | F | 18 | - | 0 | + | + | + | + | + | - | NA | ST: +/- |
| Vassallo *et al 167* | F | 22 | + | >0 | + | NA | NA | NA | NA | NA | NA | NA |
| Iftikhar *et al 168* | M | 24 | + | 0 | + | + | + | + | - | - | NA | HD: +/- |
| Prabhat  *et al 169* | M | 24 | + | 0 | + | + | + | + | - | - | NA | HD: +/- |

**Notes:** + = present or abnormal; - = absent or normal; NA = not available. a Diagnosis of SLE according to ACR criteria b SLE duration in years c Outcome: ++ = full recovery; + = nearly complete recovery; +/- = partial improvement; - = no improvement; -- = death

**Abbreviations:** CSF, cerebrospinal fluid; HD, during hospital stay or at hospital discharge; OCB, oligoclonal bands; sMRI, MRI of the spinal cord; ST, short term, between hospital discharge – 6 months; LT, long term (longer than 6 months); WBC, white blood cells

### V: References, part II

53. Kenik JG, Krohn K, Kelly RB, Bierman M, Hammeke MD, Hurley JA. Transverse myelitis and optic neuritis in systemic lupus erythematosus: a case report with magnetic resonance imaging findings. *Arthritis Rheum.* 1987;30(8):947-950.

54. Boumpas DT, Patronas NJ, Dalakas MC, Hakim CA, Klippel JH, Balow JE. Acute transverse myelitis in systemic lupus erythematosus: magnetic resonance imaging and review of the literature. *J Rheumatol.* 1990;17(1):89-92.

55. Moriwaka F, Tashiro K, Fukazawa T, et al. A case of systemic lupus erythematosus--its clinical and MRI resemblance to multiple sclerosis. *Jpn J Psychiatry Neurol.* 1990;44(3):601-605.

56. Berlanga B, Ramon Rubio F, Moga I, Pac V. Response to intravenous cyclophosphamide treatment in lupus myelopathy [5]. *Journal of Rheumatology.* 1992;19(5):829-830.

57. Nived O, Sturfelt G, Ryberg B. Two UV-induced episodes of myelitis in a patient with systemic lupus erythematosus. *J Intern Med.* 1992;232(5):461-463.

58. Simeon-Aznar CP, Tolosa-Vilella C, Cuenca-Luque R, Jordana-Comajuncosa R, Ordi-Ros J, Bosch-Gil JA. Transverse myelitis in systemic lupus erythematosus: two cases with magnetic resonance imaging. *Br J Rheumatol.* 1992;31(8):555-558.

59. Tola MR, Casetta I, Granieri E, Caniatti LM, Monetti VC, Pascarella R. Systemic lupus erythematosus related recurrent transverse myelitis in a patient with myasthenia gravis and multiple sclerosis. *Eur Neurol.* 1996;36(5):327-328.

60. Holtas S, Basibuyuk N, Fredriksson K. MRI IN ACUTE TRANSVERSE MYELOPATHY. *Neuroradiology.* 1993;35(3):221-226.

61. Klaiman MD, Miller SD. Transverse myelitis complicating systemic lupus erythematosus: treatment including hydroxychloroquine. Case report. *Am J Phys Med Rehabil.* 1993;72(3):158-161.

62. Provenzale JM, Barboriak DP, Gaensler EH, Robertson RL, Mercer B. Lupus-related myelitis: serial MR findings. *AJNR Am J Neuroradiol.* 1994;15(10):1911-1917.

63. Stahl HD, Ettlin TH, Plohmann A, et al. Central nervous system lupus: concomitant occurrence of myelopathy and cognitive dysfunction. *Clin Rheumatol.* 1994;13(2):273-279.

64. Lopez Dupla M, Khamashta MA, Sanchez AD, Ingles FP, Uriol PL, Aguado AG. Transverse myelitis as a first manifestation of systemic lupus erythematosus: a case report. *Lupus.* 1995;4(3):239-242.

65. Oriordan JI, Gallagher HL, Thompson AJ, et al. Clinical, CSF, and MRI findings in Devic's neuromyelitis optica. *Journal of Neurology Neurosurgery and Psychiatry.* 1996;60(4):382-387.

66. Kuzma BB, Goodman JM. Spinal cord swelling and brain lesions in lupus myelitis. *Surg Neurol.* 1997;48(2):200-202.

67. Radis CD, Callis KP. Systemic lupus erythematosus with membranous glomerulonephritis and transverse myelitis associated with anabolic steroid use. *Arthritis Rheum.* 1997;40(10):1899-1902.

68. Habr F, Wu B. Acute transverse myelitis in systemic lupus erythematosus: a case of rapid diagnosis and complete recovery. *Conn Med.* 1998;62(7):387-390.

69. Inslicht DV, Stein AB, Pomerantz F, Ragnarsson KT. Three women with lupus transverse myelitis: case reports and differential diagnosis. *Arch Phys Med Rehabil.* 1998;79(4):456-459.

70. Schantz V, Oestergaard LL, Junker P. Shrinking spinal cord following transverse myelopathy in a patient with systemic lupus erythematosus and the phospholipid antibody syndrome. *J Rheumatol.* 1998;25(7):1425-1428.

71. Rodriguez AS, Oterino JA, Hernandez PA. Lupus myelitis. *Arch Intern Med.* 1998;158(20):2267-2268.

72. Deodhar AA, Hochenedel T, Bennett RM. Longitudinal involvement of the spinal cord in a patient with lupus related transverse myelitis. *J Rheumatol.* 1999;26(2):446-449.

73. Huang TY, Sileo DR, Huang JT, Postel GC, Abaskaron M, Aaron JO. MR imaging of acute transverse myelitis. *J Ky Med Assoc.* 1999;97(4):165-167.

74. Margaux J, Hayem G, Meyer O, Kahn MF. Systemic lupus erythematosus with optical neuromyelitis (Devic's syndrome). A case with a 35-year follow-up. *Rev Rhum Engl Ed.* 1999;66(2):102-105.

75. Mok CC, Lee KW, Wong RW, Lau CS. Acute lupus myelitis affecting the clonus medullaris. *Clin Exp Rheumatol.* 1999;17(1):123-124.

76. Neumann-Andersen G, Lindgren S. Involvement of the entire spinal cord and medulla oblongata in acute catastrophic-onset transverse myelitis in SLE. *Clin Rheumatol.* 2000;19(2):156-160.

77. Trysberg E, Lindgren I, Tarkowski A. Autologous stem cell transplantation in a case of treatment resistant central nervous system lupus. *Ann Rheum Dis.* 2000;59(3):236-238.

78. Tellez-Zenteno JF, Remes-Troche JM, Negrete-Pulido RO, Davila-Maldonado L. Longitudinal myelitis associated with systemic lupus erythematosus: clinical features and magnetic resonance imaging of six cases. *Lupus.* 2001;10(12):851-856.

79. Yazawa S, Kawasaki S, Ohi T, et al. Development of severe longitudinal atrophy of thoracic spinal cord following lupus-related myelitis. *Intern Med.* 2001;40(4):353-357.

80. Gibbs AN, Moroney J, Foley-Nolan D, O'Connell PG. Neuromyelitis optica (Devic's syndrome) in systemic lupus erythematosus: a case report. *Rheumatology (Oxford).* 2002;41(4):470-471.

81. Kimura KY, Seino Y, Hirayama Y, et al. Systemic lupus erythematosus related transverse myelitis presenting longitudinal involvement of the spinal cord. *Intern Med.* 2002;41(2):156-160.

82. Drake WP, Byrd VM, Olsen NJ. Reactivation of systemic lupus erythematosus after initiation of highly active antiretroviral therapy for acquired immunodeficiency syndrome. *J Clin Rheumatol.* 2003;9(3):176-180.

83. Leung FK, Fortin PR. Intravenous cyclophosphamide and high dose corticosteroids improve MRI lesions in demyelinating syndrome in systemic lupus erythematosus. *Journal of Rheumatology.* 2003;30(8):1871-1873.

84. Suralkar SS, Bichile LS, Sonawale AS, Rajyadhyaksha AG, Kothari C. Myelitis as a presenting feature of systemic lupus erythromatosus. *J Assoc Physicians India.* 2003;51:62-63.

85. Charakidas A, Brouzas D, Perraki A, Moschos M. Neuromyelitis optica (Devic's disease) in a case of systemic lupus erythematosus with antiphospholipid antibodies: Is there a role for anticoagulants? *Neuro-Ophthalmology.* 2004;28(4):179-181.

86. Krishnan AV, Halmagyi GM. Acute transverse myelitis in SLE. *Neurology.* 2004;62(11):2087-.

87. Lehnhardt FG, Impekoven P, Rubbert A, et al. Recurrent longitudinal myelitis as primary manifestation of SLE. *Neurology.* 2004;63(10):1976.

88. Mok CC, Mak A, Tsui EYK. Shrinking central nervous system in systemic lupus erythematosus. *Annals of the Rheumatic Diseases.* 2004;63(5):603-604.

89. Moranne O, Hachulla E, Valat AS, Sotoares G, Pagniez D, Boulanger E. Longitudinal myelitis in a pregnant patient with SLE. *Am J Med.* 2004;116(5):355-357.

90. dos Santos VM, Correia Garcia E, Leao Rabelo F, Menezes Haase Lobo GE, Santos Damasceno MA. Transverse myelitis and chronic urticaria in systemic lupus erythematosus. Case report. *Rev Med Chil.* 2005;133(2):209-213.

91. Ferreira S, Marques P, Carneiro E, D'Cruz D, Gama G. Devic's syndrome in systemic lupus erythematosus and probable antiphospholipid syndrome. *Rheumatology (Oxford).* 2005;44(5):693-695.

92. Fioravanti A, Vallone IM, Cantarini L, Malandrini A, Cerase A. Long-term follow-up of lupus-related subacute myelopathy treated by plasmapheresis and pulse cyclophosphamide. *Clin Exp Rheumatol.* 2005;23(5):734.

93. Hagiwara N, Toyoda K, Uwatoko T, Yasumori K, Ibayashi S, Okada Y. Successful high dose glucocorticoid treatment for subacute neuromyelitis optica with systemic lupus erythematosus. *Intern Med.* 2005;44(9):998-1001.

94. Rheu CW, Lee SI, Yoo WH. A catastrophic-onset longitudinal myelitis accompanied by bilateral internuclear ophthalmoplegia in a patient with systemic lupus erythematosus. *J Korean Med Sci.* 2005;20(6):1085-1088.

95. Yago T, Tateishi M, Ichikawa N, et al. A case of systemic lupus erythematosus presenting transverse myelitis after an episode of meningitis. *Mod Rheumatol.* 2005;15(5):367-370.

96. Yamanaka F, Migita K, Ichinose K, et al. Catastrophic transverse myelitis in a patient with systemic lupus erythematosus. *Mod Rheumatol.* 2005;15(2):130-133.

97. Armstrong DJ, McCarron MT, Wright GD. SLE-associated transverse myelitis successfully treated with Rituximab (anti-CD20 monoclonal antibody). *Rheumatol Int.* 2006;26(8):771-772.

98. Lehnhardt FG, Scheid C, Holtik U, et al. Autologous blood stem cell transplantation in refractory systemic lupus erythematodes with recurrent longitudinal myelitis and cerebral infarction. *Lupus.* 2006;15(4):240-243.

99. Birnbaum J, Kerr D. Devic's syndrome in a woman with systemic lupus erythematosus: diagnostic and therapeutic implications of testing for the neuromyelitis optica IgG autoantibody. *Arthritis Rheum.* 2007;57(2):347-351.

100. Heinlein AC, Gertner E. Marked inflammation in catastrophic longitudinal myelitis associated with systemic lupus erythematosus. *Lupus.* 2007;16(10):823-826.

101. Ilniczky S, Kamondi A, Aranyi Z, et al. Simultaneous central and peripheral nervous system involvement in systemic lupus erythematosus. *Ideggyogy Sz.* 2007;60(9-10):398-402.

102. Tomietto P, D'Agostini S, Annese V, De Vita S, Ferraccioli G. Mycophenolate mofetil and intravenous dexamethasone in the treatment of persistent lupus myelitis. *J Rheumatol.* 2007;34(3):588-591.

103. Touma Z, Atweh SF, Kibbi L, Arayssi T. Longitudinal myelitis in patient with systemic lupus erythematosus, homozygous prothrombin G20210A and heterozygous MTHFR 677T. *Lupus.* 2007;16(7):517-520.

104. Birnbaum J, Kerr D. Optic neuritis and recurrent myelitis in a woman with systemic lupus erythematosus. *Nat Clin Pract Rheumatol.* 2008;4(7):381-386.

105. Mehta LR, Samuelsson MK, Kleiner AK, et al. Neuromyelitis optica spectrum disorder in a patient with systemic lupus erythematosus and anti-phospholipid antibody syndrome. *Mult Scler.* 2008;14(3):425-427.

106. Mok CC, To CH, Mak A, Poon WL. Immunoablative cyclophosphamide for refractory lupus-related neuromyelitis optica. *J Rheumatol.* 2008;35(1):172-174.

107. Orzechowski NM, Michet CJ, Jr. Longitudinal myelitis. *Mayo Clin Proc.* 2008;83(3):350.

108. Almoallim H, Bukhari M, Alwafi L, Wali G. Transverse myelitis as a presenting feature of late onset systemic lupus erythematosus. *Ann Saudi Med.* 2009;29(2):156-157.

109. Ammouri W, Mezalek ZT, Harmouche H, Aouni M, Adnaoui M, Maaouni A. Myelitis complicating systemic lupus erythematosus: successfully treated with corticosteroids and cyclophosphamide. *South Med J.* 2009;102(7):744-745.

110. Celebisoy N, Gulec F, Bayrakci A, Yargucu F. Longitudinal myelitis as the first manifestation of systemic lupus erythematosus. *Journal of Neurological Sciences.* 2009;26(4):492-494.

111. Karim S, Majithia V. Devic's syndrome as initial presentation of systemic lupus erythematosus. *Am J Med Sci.* 2009;338(3):245-247.

112. Mottaghi P, Ashtari F, Karimzadeh H, Seidbonakdar Z, Karimifar M, Salesi M. Devic's syndrome concomitant with nephritis in a young woman. *Clin Rheumatol.* 2009;28(10):1239-1240.

113. Mula M, Bolamperti L, Varrasi C, et al. SLE-related longitudinal myelitis with favorable outcome. *Can J Neurol Sci.* 2009;36(3):393-397.

114. Nasir S, Kerr DA, Birnbaum J. Nineteen episodes of recurrent myelitis in a woman with neuromyelitis optica and systemic lupus erythematosus. *Arch Neurol.* 2009;66(9):1160-1163.

115. Gonzalez Ibarra FP, Garcia Tizoc E, Rojo Jimenez AG, Aguila Gastelum CL, Jorge Alberto ZL, Maradiaga Cecena MA. Acute transverse myelitis in systemic lupus erythematosus: Report of a case. *Critical Care and Shock.* 2010;13(1):18-21.

116. Katchanov J, Grassl W, Wenzel R. Longitudinal brainstem involvement in systemic lupus erythematosus. *Lupus.* 2010;19(3):335-336.

117. Marcel C, Kremer S, Jeantroux J, Blanc F, Dietemann JL, De Seze J. Diffusion-weighted imaging in noncompressive myelopathies: a 33-patient prospective study. *J Neurol.* 2010;257(9):1438-1445.

118. Pellkofer HL, Hohlfeld R, Kuempfel T. Thirty-one episodes of myelitis and optic neuritis in a woman with neuromyelitis optica and systemic lupus erythematosus. *Arch Neurol.* 2010;67(6):779-780; author reply 780.

119. Richard Mornas A, Thomas T, Pallot Prades B, Chopin F, Raoux D. Longitudinal myelitis in a patient with systemic lupus erythematosus. *Joint Bone Spine.* 2010;77(2):181-183.

120. Zotos P, Poularas J, Karakitsos D, Karabinis A. Lupus related longitudinal myelitis. *J Rheumatol.* 2010;37(8):1776.

121. Deme SM, Jianu DC, Calomfirescu SK. A case repost of chronic urticaria in systemic lupus erythematosus associating transverse myelitis. *Romanian Journal of Neurology/ Revista Romana de Neurologie.* 2011;10(1):52-58.

122. Kayim Yildiz O, Balaban H, Senel S. Anti-aquaporin-4 antibody positive relapsing neuromyelitis optica in a patient with systemic lupus erythematosus. *Journal of Neurological Sciences.* 2011;28(3):376-379.

123. Polgar A, Rozsa C, Muller V, Matolcsi J, Poor G, Kiss EV. Devic's syndrome and SLE: challenges in diagnosis and therapeutic possibilities based on two overlapping cases. *Autoimmun Rev.* 2011;10(3):171-174.

124. Ye Y, Qian J, Gu Y, Chen X, Ye S. Rituximab in the treatment of severe lupus myelopathy. *Clin Rheumatol.* 2011;30(7):981-986.

125. Hernando Rubio I, Belzunegui Otano J, Maiz Alonso O, Alvarez Rodriguez B. Transverse myelitis and bilateral optic neuritis in a patient with systemic lupus erythematosus. *Reumatol Clin.* 2012;8(5):298-299.

126. Katsumata Y, Kawachi I, Kawaguchi Y, et al. Semiquantitative measurement of aquaporin-4 antibodies as a possible surrogate marker of neuromyelitis optica spectrum disorders with systemic autoimmune diseases. *Mod Rheumatol.* 2012;22(5):676-684.

127. White C, Leonard B, Patel A. Longitudinally extensive transverse myelitis: a catastrophic presentation of a flare-up of systemic lupus erythematosus. *Cmaj.* 2012;184(3):E197-200.

128. Gude DC, Chennamsetty S, Bansal DP, Jha R. Transverse myelitis in antiphospholipid antibody negative systemic lupus erythematosus. *J Indian Med Assoc.* 2013;111(6):406-407.

129. Huang LK, Chung CC, Chen BZ, Chi NF, Hu CJ. Systemic lupus erythematosus presented as extensive longitudinal myelitis. *Acta Neurol Taiwan.* 2013;22(2):67-71.

130. Jiang DX, Liao Y, Bai YJ. Successful treatment for neuromyelitis optica with systemic lupus erythematosus. *Chin Med J (Engl).* 2013;126(20):3996.

131. Yachoui R, Kolasinski SL, Han BK. Intractable vomiting as an initial presentation of lupus-related neuromyelitis optica. *J Clin Rheumatol.* 2013;19(3):154-155.

132. Zavada J, Nytrova P, Wandinger KP, et al. Seroprevalence and specificity of NMO-IgG (anti-aquaporin 4 antibodies) in patients with neuropsychiatric systemic lupus erythematosus. *Rheumatol Int.* 2013;33(1):259-263.

133. Adawi M, Bisharat B, Bowirrat A. Systemic Lupus Erythematosus (SLE) Complicated by Neuromyelitis Optica (NMO - Devic's Disease): Clinic-Pathological Report and Review of the Literature. *Clin Med Insights Case Rep.* 2014;7:41-47.

134. Kim SY, Yoon TS, Suh JH. Concomitant occurrence of cervical myelopathy, cerebral infarction, and peripheral neuropathy in systemic lupus erythematosus: a case report. *Ann Rehabil Med.* 2014;38(2):263-268.

135. Loster-Niewinska A, Chojdak-Lukasiewicz J, Sasiadek M, Szmyrka-Kaczmarek M, Paradowski B. Acute transverse myelitis as the first clinical manifestation of systemic lupus erythematosus. *Neurol India.* 2014;62(6):712-713.

136. Modjinou D, Gurin L, Chhabra A, Mikolaenko I, Lydon E, Smiles S. A case of systemic lupus erythematosus associated with longitudinal extensive transverse myelitis, cerebral neutrophilic vasculitis, and cerebritis. *Bull Hosp Jt Dis (2013).* 2014;72(4):294-300.

137. Guerrero C, Cabezas-Quintario MA, Algora A, Martin A. Longitudinally extensive transverse myelitis with neuro-lymphatic protein expressionin systemic lupus erithematosus patient. An autopsy case report. *Revista Espanola de Patologia.* 2015;48(4):217-221.

138. Menor Almagro R, Ruiz Tudela Mdel M, Giron Ubeda J, Cardiel Rios MH, Perez Venegas JJ, Garcia Guijo C. Myelitis transverse in Sjogren's syndrome and systemic lupus erythematosus: presentation of 3 cases. *Reumatol Clin.* 2015;11(1):41-44.

139. Nardone R, Fitzgerald RT, Bailey A, Zuccoli G. Longitudinally extensive transverse myelitis in systemic lupus erythematosus: case report and review of the literature. *Clin Neurol Neurosurg.* 2015;129:57-61.

140. Takei K, Sato M, Nakamura M, Shimizu H. Longitudinally extensive transverse myelitis with anti-NMDA receptor antibodies during a systemic lupus erythematosus flare-up. *BMJ Case Rep.* 2015;2015.

141. Kovacs KT, Kalluri SR, Boza-Serrano A, et al. Change in autoantibody and cytokine responses during the evolution of neuromyelitis optica in patients with systemic lupus erythematosus: A preliminary study. *Mult Scler.* 2016;22(9):1192-1201.

142. Srivastava A, Kundu BK, Singh DK. Concomitant Guillain Barre Syndrome and Transverse Myelitis as Initial Neuropsychiatric Manifestation in a Case of Lupus: A Diagnostic Quandary. *Case Rep Rheumatol.* 2016;2016:5827860.

143. Tono T, Nagai T, Hoshiyama T, et al. Transverse myelitis extended to disseminated encephalitis in systemic lupus erythematosus: Histological evidence for vasculitis. *Mod Rheumatol.* 2016;26(6):958-962.

144. Chessa E, Piga M, Floris A, Mathieu A, Cauli A. Demyelinating syndrome in SLE: review of different disease subtypes and report of a case series. *Reumatismo.* 2017;69(4):175-183.

145. Deveza LM, Neves EF, Seguro LP, Pereira SL, Bonfa E, Pasoto SG. Longitudinal Extensive Transverse Myelitis and Central Diabetes Insipidus: A Severe Flare of Systemic Lupus Erythematosus. *J Clin Rheumatol.* 2017;23(2):122-124.

146. Mansoor AC, Jemshad A, Musambil M. Systemic lupus erythematosus presenting as rectal ulcer and longitudinal myelopathy. *Int J Rheum Dis.* 2017;20(11):1818-1820.

147. Oiwa H, Yamabe T, Kawashima M, et al. A report of three cases with lupus myelitis. *Eur J Rheumatol.* 2017;4(2):148-150.

148. Aguirre-Villarreal D, Whittall LP, Fragoso-Loyo H, Cantu-Brito C, Crispin JC, Valdes-Ferrer SI. Intrathecal formation of anticardiolipin antibodies in a patient with SLE-related relapsing longitudinal myelitis: a possible pathogenic connection. *Lupus.* 2018;27(14):2292-2295.

149. Asgari N, Jarius S, Laustrup H, et al. Aquaporin-4-autoimmunity in patients with systemic lupus erythematosus: A predominantly population-based study. *Mult Scler.* 2018;24(3):331-339.

150. Bozic K, Komatina N, Petronijevic M, Knezevic B, Kostic D, Stefanovic D. Neuromyelitis optica spectrum disorder in patient with systemic lupus erythematosus - Our experience. *Vojnosanitetski Pregled.* 2018;75(1):104-107.

151. Duarte AC, Sousa S, Nunes T, Cordeiro A, Goncalves P. Intravenous human immunoglobulin for the treatment of severe longitudinal extensive transverse myelitis associated with systemic lupus erythematous. *Acta Reumatol Port.* 2018;43(2):154-155.

152. Furtado I, Pinheiro G, Campar A, Mendonca T. Association of severe and therapy-refractory systemic lupus erythematosus and neuromyelitis optica: a management challenge. *BMJ Case Rep.* 2018;2018.

153. Raciborska DD, Noyce AJ, Pyne D, Turner BP. Lupus myelopathy. *Pract Neurol.* 2018;18(1):66-69.

154. Patterson SL, Jafri K, Narvid JA, Margaretten M. A Young Woman With Sudden Urinary Retention and Sensory Deficits. *Arthritis Care Res (Hoboken).* 2018;70(4):635-642.

155. Schattner A, Voichanski S, Uliel L. SLE presenting as demyelinative autoimmune visual loss. *BMJ Case Rep.* 2018;2018.

156. Shidahara K, Hayashi K, Sada KE, et al. Refractory neuromyelitis optica spectrum disorder in systemic lupus erythematosus successfully treated with rituximab. *Lupus.* 2018;27(8):1374-1377.

157. Zahid AS, Mubashir A, Mirza SA, Naqvi IH, Talib A. Systemic Lupus Erythematosus Presenting as Longitudinally Extensive Transverse Myelitis and Nephritis: A Case Report. *Cureus.* 2018;10(4):e2402.

158. Chaneva O, Viteva E, Trenova A, et al. Neuromyelitis Optica and Systemic Lupus Erythematosus Association - the Chicken or the Egg Dilemma: a Case Repor. *Folia Med (Plovdiv).* 2019;61(4):639-642.

159. Jackson SD, Wiering BA, Bentley IA, Herrmann AA, Hanson LR. From A to D: A Unique Case Report of Recovery After Longitudinal Myelitis Related to Lupus. *Am J Phys Med Rehabil.* 2019;98(10):e119-e122.

160. Jha VK, Sharda V, Rajkamal T, Bhatt TC. Pruritus as Unusual Manifestation of Lupus Myelopathy. *J Assoc Physicians India.* 2019;67(3):95-97.

161. Lavandier N, Bonnan M, Carra-Dalliere C, et al. First clinical inflammatory demyelinating events of the central nervous system in a population aged over 70 years: A multicentre study. *Mult Scler Relat Disord.* 2019;28:309-312.

162. Martin-Nares E, Hernandez-Molina G, Fragoso-Loyo H. Aquaporin-4-IgG positive neuromyelitis optica spectrum disorder and systemic autoimmune diseases overlap syndrome: a single-center experience. *Lupus.* 2019;28(11):1302-1311.

163. Martins N, Antunes AP, Macieira C. Neuromyelitis Optica Spectrum Disorder in a Patient With Systemic Lupus Erythematosus. *J Clin Rheumatol.* 2019;25(4):38-40.

164. Mehmood T, Munir I, Abduraimova M, Ramirez MA, Paghdal S, McFarlane IM. Longitudinally Extensive Transverse Myelitis Associated With Systemic Lupus Erythematosus: A Case Report and Literature Review. *Am J Med Case Rep.* 2019;7(10):244-249.

165. Seyedali S, Alpert DR. Longitudinal extensive transverse myelitis: a rare neurological complication of systemic lupus erythematosus. *BMJ Case Rep.* 2019;12(4).

166. Thabah MM, D S, Pranov R, Moulitej MMV, Ramesh A, Kadhiravan T. Neuromyelitis optica spectrum disorder and systemic lupus erythematosus. *Lupus.* 2019;28(14):1722-1726.

167. Vassallo J. Area Postrema Syndrome Secondary to Lupus Neuroinflammation. *J Pediatr Ophthalmol Strabismus.* 2019;56(5):340.

168. Iftikhar S, Mahmood A, Hashmat M. Neuromyelitis Optica as an Initial Presentation of Systemic Lupus Erythematosus in a Young Male. *J Coll Physicians Surg Pak.* 2020;30(3):321-323.

169. Prabhat N, Chakravarty K, Pattnaik SN, Takkar A, Ray S, Lal V. Systemic lupus erythematosus with autoimmune neurological manifestations in a carrier of chronic granulomatous disease - a rare presentation. *J Neuroimmunol.* 2020;343:577229.
